# Supplementary material for: Anaerobic killing of mucoid Pseudomonas aeruginosa by acidified nitrite derivatives under cystic fibrosis airway conditions
Source: JCI journal article supplement (doi:10.1172/jci24684), 2006-01-19
Supplement: sd1 [file 1]

**Table S1. Evaluation of various mucoid and nonmucoid CF clinical isolates from 5 different CF clinics in the United States and Canada.** Strains were obtained from patients from the designated clinics and the *mucA* genes were sequenced. Each strain was tested for sensitivity to 15 mM NO<sub>2</sub>- under anaerobic conditions as described in Figure 2B. The antibiotic resistance category under the moniker “notes” indicates that the “highly resistant” organisms are those that are resistant clinical to amikacin, ciprofloxacin, cefapime, tobramycin,

| Clinic Location | mucA mutation | mutation type                  | Log10 [CFU in 4 days / CFU in inoculum] | Patient age | Notes          |
|-----------------|---------------|--------------------------------|-----------------------------------------|-------------|----------------|
| Seattle         | Yes           | stop at 441                    | -2.15                                   | N/A         | No PCR product |
| Seattle         | Yes           | stop at 369                    | -1                                      | N/A         |                |
| Seattle         | Yes           | stop at 387                    | -0.3                                    | N/A         |                |
| Seattle         | <b>No</b>     |                                | 0.3                                     | N/A         |                |
| Wichita         | Yes           | stop at 351                    | -2.52                                   | N/A         |                |
| Cleveland       | Yes           | stop at 351                    | -4                                      | N/A         |                |
| Kansas city     | Yes           | stop at 387                    | <-5                                     | N/A         |                |
| San Francisco   | Yes           | stop at 426                    | -3.52                                   | N/A         |                |
| Jackson         | Yes           | stop at 441                    | -4.7                                    | N/A         |                |
| Omaha           | Yes           | stop at 351                    | <-5                                     | N/A         |                |
| Boston          | Yes           | stop at 480                    | <-5                                     | N/A         |                |
| Gainsville      | Yes           | stop at 441                    | <-5                                     | N/A         |                |
| Gainsville      | Yes           | stop at 426                    | -0.53                                   | N/A         |                |
| Gainsville      | Yes           | No stop codon, 4 bp insertion  | -4.22                                   | N/A         |                |
| Columbia U.     | Yes           | stop at 369                    | -4.1                                    | 21          |                |
| Columbia U.     | Yes           | stop at 387                    | <-5                                     | 20          |                |
| Columbia U.     | Yes           | stop at 354                    | -4.52                                   | 20          |                |
| Columbia U.     | Yes           | stop at 351                    | -3.53                                   | 25          |                |
| Columbia U.     | <b>N/D</b>    |                                | <-5                                     | 63          |                |
| Columbia U.     | <b>No</b>     |                                | -1.69                                   | 34          |                |
| Columbia U.     | Yes           | stopat 342                     | -2.54                                   | 27          |                |
|                 |               | No stop codon, 127 bp deletion |                                         |             |                |
| Columbia U.     | Yes           |                                | <-5                                     | 59          |                |
| Columbia U.     | <b>No</b>     |                                | -3.7                                    | 39          |                |
| Columbia U.     | Yes           | stop at 354                    | <-5                                     | 22          |                |
| Columbia U.     | Yes           | stop at 441                    | -1.523                                  | 22          |                |
| Columbia U.     | Yes           | stop at 423                    | <-5                                     | 20          |                |
| Columbia U.     | Yes           | stop at 291, 5 bp insertion    | -1.52                                   | 28          |                |
| Columbia U.     | Yes           | stop at 354                    | <-5                                     | 25          |                |
| Columbia U.     | Yes           | stop at 387                    | <-5                                     | 14          |                |
| Columbia U.     | Yes           | stop at 441                    | <-5                                     | 36          |                |

|               |           |                                |       |     |                                 |
|---------------|-----------|--------------------------------|-------|-----|---------------------------------|
| Columbia U.   | Yes       | stop at 441                    | <-5   | 45  |                                 |
| Columbia U.   | Yes       | stop at 387                    | -3.3  | N/A |                                 |
| Columbia U.   | Yes       | stop at 120                    | -3.5  | N/A |                                 |
| Columbia U.   | Yes       | stop at 120                    | -2    | N/A |                                 |
| Columbia U.   | Yes       | stop at 387                    | -3    | N/A |                                 |
| Columbia U.   | Yes       | stop at 288, 2 bp insertion    | -3.3  | N/A |                                 |
| Columbia U.   | Yes       | stop at 330                    | -3.78 | N/A |                                 |
| Columbia U.   | Yes       | stop at 387                    | -3.18 | N/A |                                 |
| Columbia U.   | Yes       | stop at 441                    | -3.9  | N/A |                                 |
| Columbia U.   | Yes       | stop at 354                    | -3.3  | N/A |                                 |
| Columbia U.   | Yes       | No stop codon, 23 bp insertion | -2.15 | N/A |                                 |
| Columbia U.   | Yes       | stop at 441                    | -3.6  | N/A |                                 |
| Columbia U.   | Yes       | stop at 387                    | -3.48 | N/A |                                 |
| Columbia U.   | Yes       | No stop codon, 46 bp deletion  | -1.35 | N/A |                                 |
| Columbia U.   | Yes       | stop at 285                    | -3.6  | N/A |                                 |
| Columbia U.   | Yes       | stop at 441                    | -2.7  | N/A |                                 |
| Columbia U.   | Yes       | No stop codon                  | -3.7  | N/A |                                 |
| Columbia U.   | <b>No</b> |                                | -0.31 | N/A |                                 |
| CH Boston     | Yes       | stop at 441                    | <-5   | 26  |                                 |
| CH Boston     | Yes       | stop at 369                    | -3.22 | 45  |                                 |
| CH Boston     | Yes       | No stop codon                  | <-5   | 24  |                                 |
| CH Boston     | Yes       | stop at 441                    | -3.3  | 39  | Highly resistant to antibiotics |
| CH Boston     | Yes       | stop at 351                    | -2.11 | 11  |                                 |
| CH Boston     | Yes       | stop at 396, 45 bp deletion    | -3.15 | 37  |                                 |
| CH Boston     | <b>No</b> |                                | -1.12 | 27  |                                 |
| CH Boston     | Yes       | stop at 483, 7 bp insertion    | <-5   | 20  | Highly resistant to antibiotics |
| CH Boston     | Yes       | stop at 441                    | -2.15 | 50  |                                 |
| CH Boston     | Yes       | stop at 378, 100 bp deletion   | <-5   | 25  |                                 |
| CH Boston     | Yes       | stop at 441                    | -1.39 | 7   |                                 |
| CH Boston     | Yes       | stop at 426                    | -1.78 | 13  |                                 |
| CH Boston     | Yes       | stop at 369                    | <-5   | 56  |                                 |
| CH Boston     | Yes       | stop at 285                    | -3.05 | 23  | Highly resistant to antibiotics |
| CH Boston     | Yes       | stop at 441                    | -1.52 | 6   |                                 |
| CH Boston     | Yes       | stop at 354                    | -3.3  | 29  | Highly resistant to antibiotics |
| CH Cincinnati | <b>No</b> |                                | 0.75  | N/A |                                 |
| CH Cincinnati | Yes       | stop at 441                    | <-5   | N/A |                                 |
| CH Cincinnati | Yes       | stop at 384                    | -2.15 | N/A |                                 |
| CH Cincinnati | <b>No</b> |                                | 1.01  | N/A |                                 |
| CH Cincinnati | Yes       | stop at 441                    | -3.78 | N/A |                                 |
| CH Cincinnati | <b>No</b> |                                | 0.41  | N/A |                                 |
| CH Cincinnati | Yes       | stop at 369                    | -4.25 | N/A |                                 |
| CH Cincinnati | Yes       | stop at 369                    | -1.98 | N/A |                                 |
| CH Cincinnati | Yes       | stop at 441                    | -2.79 | N/A |                                 |
| CH Cincinnati | Yes       | stop at 426                    | <-5   | N/A |                                 |

|               |           |                               |       |      |
|---------------|-----------|-------------------------------|-------|------|
| CH Cincinnati | <b>No</b> |                               | 0.23  | N/A  |
| CH Cincinnati | Yes       | stop at 438                   | -2.15 | N/A  |
| CH Cincinnati | Yes       | No stop codon, 20 bp deletion | <-5   | N/A  |
| CH Cincinnati | Yes       | stop at 441                   | -4.21 | N/A  |
| CH Cincinnati | Yes       | stop at 441                   | <-5   | N/A  |
| CH Cincinnati | Yes       | No stop codon, 2 bp insertion | <-5   | N/A  |
| CH Cincinnati | Yes       | stop at 285                   | <-5   | N/A  |
| CH Cincinnati | Yes       | stop at 384                   | -2.17 | N/A  |
| UBC           | Yes       | No stop codon, 4 bp deletion  | -4.10 | 13.7 |
| UBC           | Yes       | stop at 387                   | 0.3   | 3.4  |
| UBC           | Yes       | No stop codon, 5 bp insertion | <-5   | 11.8 |
| UBC           | Yes       | stop at 441                   | -4.2  | 16.3 |
| UBC           | <b>No</b> |                               | 0.8   | 15   |
| UBC           | Yes       | stop at 354                   | -4.3  | 6.5  |
| UBC           | <b>No</b> |                               | 0.3   | 5.5  |
| UBC           | Yes       | stop at 441                   | -2.1  | 9.3  |
| UBC           | Yes       | stop at 369                   | -2.7  | 9.7  |
| UBC           | Yes       | stop at 441                   | <-5   | 9.9  |
| UBC           | <b>No</b> |                               | 0.1   | 9.6  |
| UBC           | Yes       | stop at 441                   | 0.41  | 7.7  |

**Table S2.** Kinetic Simulations Details of Acidified Nitrite Decomposition in Anaerobic Buffer and With Added Carboxy-PTIO. (All rate constants are in  $M^{-1} s^{-1}$ , except one, as shown.)

| No. | reaction                                                                | forward rate constant    | reverse rate constant |
|-----|-------------------------------------------------------------------------|--------------------------|-----------------------|
| 1   | $HNO_2 \leftrightarrow NO_2^- + H^+$                                    | $5.0 \times 10^7 s^{-1}$ | $1.0 \times 10^{11}$  |
| 2   | $HNO_2 + HNO_2 \leftrightarrow NO + NO_2^\bullet + H_2O$                | 13.4                     | $1.6 \times 10^8$     |
| 3   | $NO_2^\bullet + NO_2^\bullet + H_2O \rightarrow NO_2^- + NO_3^- + 2H^+$ | $8.4 \times 10^7$        | 0                     |
| 4   | $Carboxy-PTIO + NO \rightarrow Carboxy-PTI + NO_2^\bullet$              | $1.0 \times 10^4$        | 0                     |

Precise time dependencies for all species are obtained by numerically solving a set of differential equations that includes rate laws for each species, except  $H^+$  and  $H_2O$ , which are kept constant.

Input parameters: initial concentrations of  $NO_2^-$  and Carboxy-PTIO, pH

The rate data are compiled from the following:

Reactions 1-3. Park, J.-Y., and Lee, Y.-N. 1988. Solubility and Decomposition Kinetics of Nitrous Acid in Aqueous Solution. *J. Phys. Chem. A* 92:6294-6302.

Reaction 4. Akaike, T., Yoshida, M., Miyamoto, Y., Sato, K., Kohno, M., Sasamoto, K., Miyazaki, K., Ueda, S., and Maeda, H. 1993. Antagonistic action of imidazolineoxyl N-oxides against endothelium-derived relaxing factor/ $^*NO$  through a radical reaction. *Biochemistry* 32:827-832, and Joseph, J., Kalyanaraman, B., and Hyde, J.S. 1993. Trapping of nitric oxide by nitronyl nitroxides: an electron spin resonance investigation. *Biochem Biophys Res Commun* 192:926-934.

Several features of the  $HNO_2$  decomposition born out by modeling are pertinent to the results shown in Figure 4:

(a) The concentration of  $NO_2^\bullet$  remains well below 1% of the NO concentration from 15 minutes onward upon  $NO_2^-$  addition under conditions of Figure 4B.

(b) The accumulated NO levels reached at 5 hours in neat buffer are strongly pH-dependent, increasing by a factor of ~20 per one-unit pH decrease from 7.5 to 6.5 and then to 5.5.

(c) A one-unit pH change is equivalent to a 10-fold change in the concentration of added  $NO_2^-$ ; e.g., the NO accumulation profiles are identical in buffered 15 mM  $NO_2^-$ /pH 6.5 and 1.5 mM  $NO_2^-$ /pH 5.5, thereby explaining the results in Figure 4A.

(d) The addition of 200 nM Carboxy-PTIO results in 90% NO depletion in 25 minutes, as observed in Figure 4B.

(e) Under the conditions of Figure 4C, Carboxy-PTIO will persist in solution for several weeks, keeping NO concentrations at picomolar levels.
